# Supplementary material for: Incidence and mortality rates of keratinocyte carcinoma from 1998–2017: a population-based study of sex differences in Ontario, Canada
Source: PubMed Central journal article supplement — CMAJ. 2021 Oct 4;193(39):E1516–24. doi: 10.1503/cmaj.210595 (PMC8568084; doi:10.1503/cmaj.210595), 2021-10-04
Supplement: 210595-res-1-at.pdf [file 210595-res-1-at.pdf]

## Supplemental Methods

The validated claims-based algorithm, identifies keratinocyte carcinoma if the index claim (specimen collection) is not for an anogenital site and any one of the following 3 criteria is present:

- (1) index claim for cutaneous specimen collection (biopsy or surgery), followed by any claim accompanied by International Classification of Diseases (ICD)-9 diagnosis code 173 or ICD-10-CA diagnosis code C44 (nonmelanoma skin cancer) in the subsequent 180 days
- (2) index claim for skin cancer surgical treatment accompanied by ICD diagnosis code 173 or C44
- (3) hospital discharge record with ICD diagnosis code 173 or C44.

## Reference:

Chan AW, Fung K, Tran JM, Kitchen J, Austin PC, Weinstock MA, et al. Application of Recursive Partitioning to Derive and Validate a Claims-Based Algorithm for Identifying Keratinocyte Carcinoma (Nonmelanoma Skin Cancer). *JAMA Dermatol*. 2016;152(10):1122-7.

Supplemental Tables and Figures

Table S1. Annual crude KC incidence and KC-specific mortality rates among white adults in Ontario (1998-2017)

| Year of diagnosis | Crude incidence rate per 100,000 white adults (95% CI) | Crude KC-specific mortality rate per 1,000,000 white adults (95% CI) |
|-------------------|--------------------------------------------------------|----------------------------------------------------------------------|
| 1998              | 382.6<br>(379.1-386.2)                                 | 7.44<br>(5.89-9.33)                                                  |
| 1999              | 372.4<br>(369-375.9)                                   | 9.57<br>(7.82-11.65)                                                 |
| 2000              | 361.1<br>(357.8-364.4)                                 | 9.58<br>(7.85-11.64)                                                 |
| 2001              | 362.8<br>(359.6-366)                                   | 9.20<br>(7.53-11.19)                                                 |
| 2002              | 343.3<br>(340.3-346.4)                                 | 10.63<br>(8.85-12.72)                                                |
| 2003              | 332.5<br>(329.5-335.4)                                 | 18.51<br>(16.15-21.17)                                               |
| 2004              | 339.2<br>(336.2-342.1)                                 | 19.76<br>(17.35-22.47)                                               |
| 2005              | 352.3<br>(349.3-355.2)                                 | 17.82<br>(15.56-20.37)                                               |
| 2006              | 368.7<br>(365.8-371.7)                                 | 18.45<br>(16.17-21.03)                                               |
| 2007              | 365.1<br>(362.2-367.9)                                 | 23.89<br>(21.30-26.77)                                               |
| 2008              | 381.3<br>(378.4-384.2)                                 | 25.00<br>(22.38-27.91)                                               |
| 2009              | 388.1<br>(385.3-391)                                   | 30.42<br>(27.56-33.57)                                               |
| 2010              | 399.4<br>(396.6-402.3)                                 | 33.79<br>(30.80-37.06)                                               |
| 2011              | 423.6<br>(420.8-426.5)                                 | 30.08<br>(27.30-33.14)                                               |
| 2012              | 421.7<br>(418.9-424.5)                                 | 34.24<br>(31.30-37.46)                                               |
| 2013              | 441.7<br>(438.9-444.5)                                 | 36.48<br>(33.47-39.75)                                               |
| 2014              | 447.9<br>(445.2-450.7)                                 | 37.20<br>(34.19-40.47)                                               |
| 2015              | 459.8<br>(457.1-462.6)                                 | 37.65<br>(34.65-40.91)                                               |
| 2016              | 480.6<br>(477.9-483.4)                                 | 42.51<br>(39.35-45.93)                                               |
| 2017              | 488.9<br>(486.2-491.6)                                 | 41.84<br>(38.74-45.20)                                               |

Figure S1. Annual crude KC-specific mortality rates by sex and age among adults in Ontario (1998-2017)

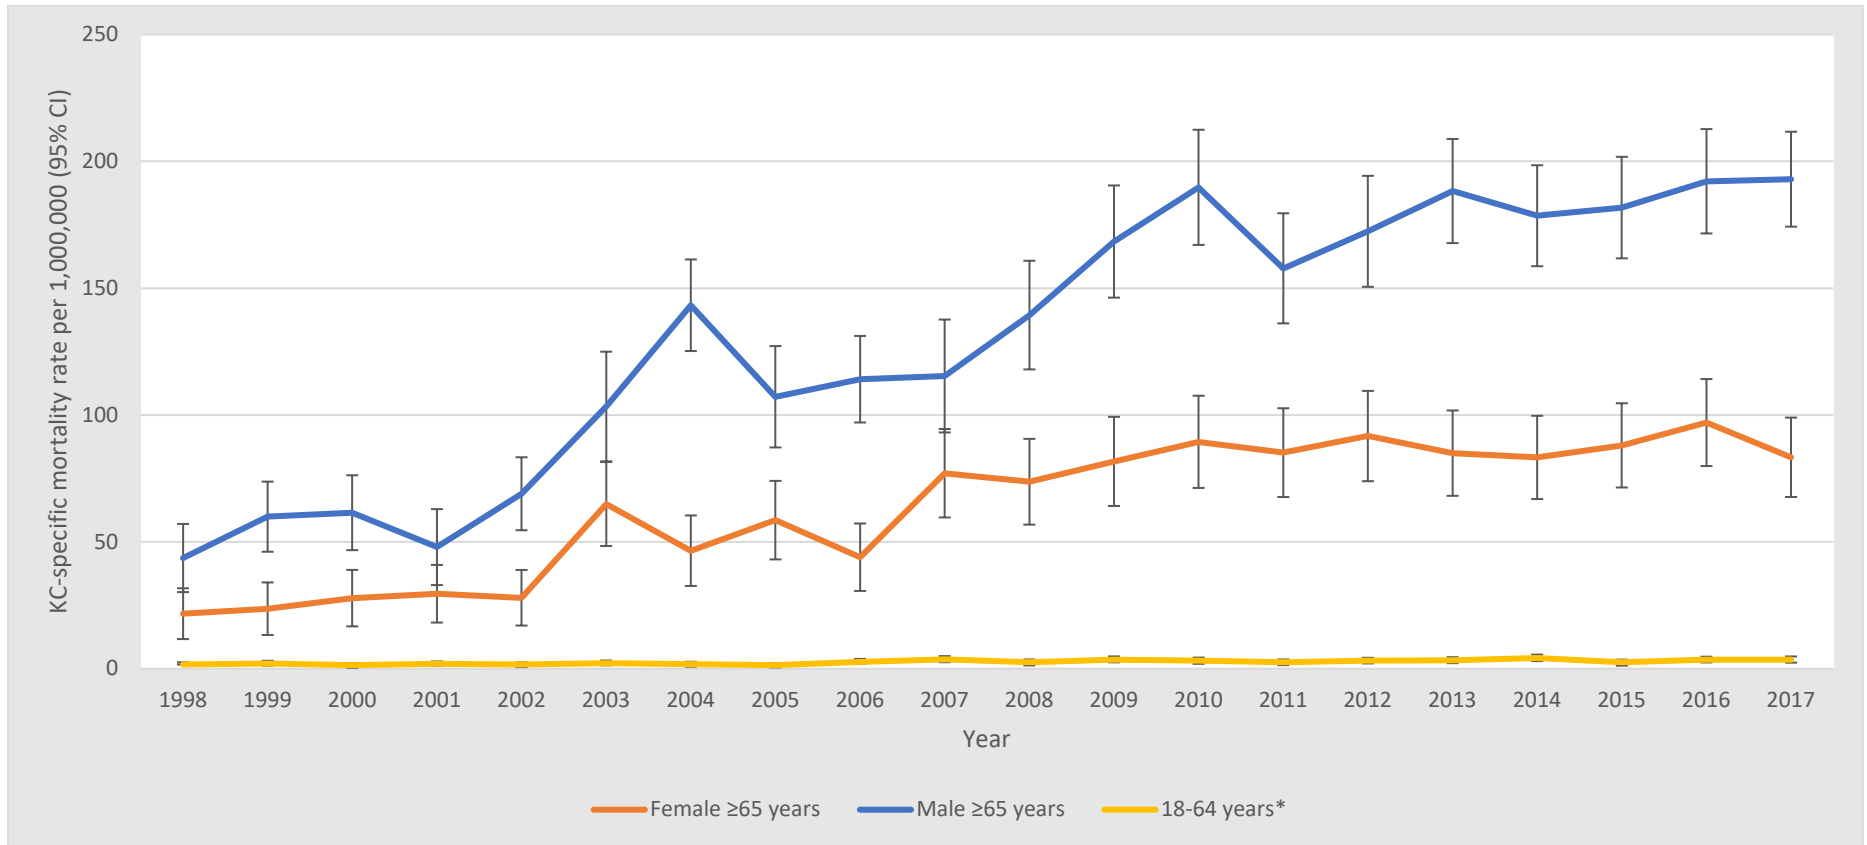

\* To protect privacy, younger age groups were combined and not stratified by sex so that no data cell contained fewer than 6 individuals.

Figure S2. Annual standardized KC-specific mortality rates by income quintile among Ontario adults (1998-2017)

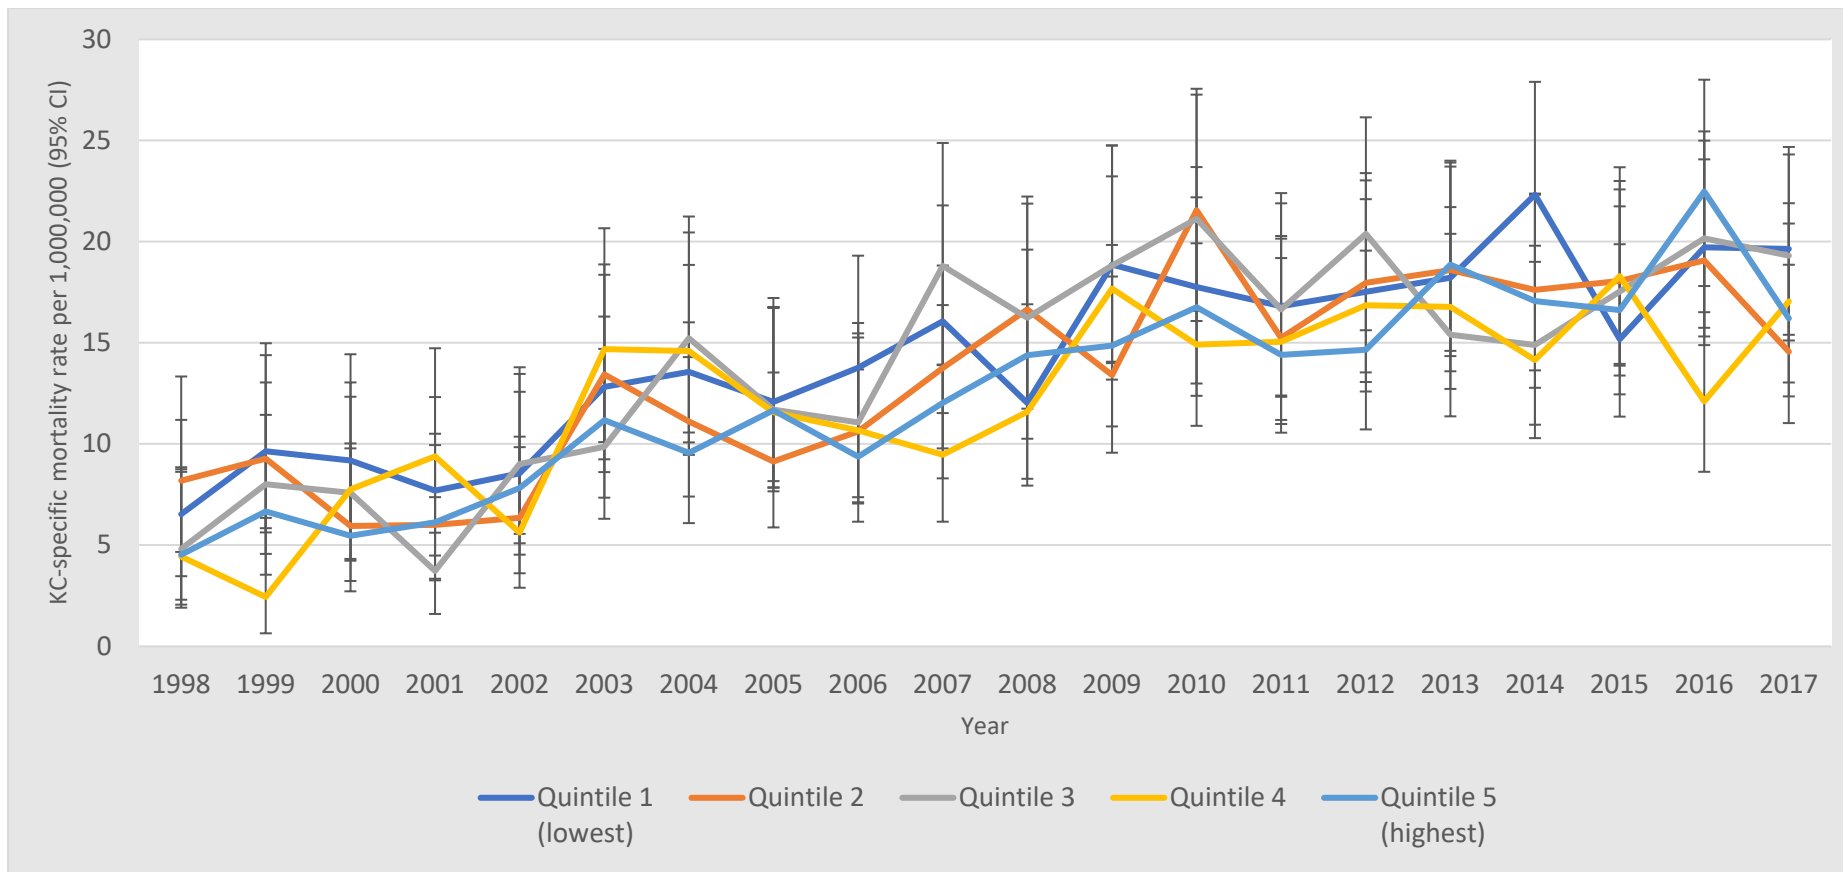

KC-specific mortality rates were age- and sex-standardized using the 1991 Canadian population
